# Supplementary material for: Transdifferentiation of pancreatic progenitor cells to hepatocyte-like cells is not serum-dependent when facilitated by extracellular matrix proteins
Source: PubMed Central journal article supplement (PMC5847606; doi:10.1038/s41598-018-22596-z), 2018-03-12

## **Transdifferentiation of pancreatic progenitor cells to hepatocyte-like cells is not serum-dependent when facilitated by extracellular matrix proteins**

Francis D. Gratte, Sara Pasic, John K. Olynyk, George C. T. Yeoh, David Tosh,  
Deirdre R. Coombe and Janina E. E. Tirnitz-Parker

### **Supplemental Figure Legend**

#### **Supplemental Online Video 1**

Live cell imaging of cells grown under differentiation-inducing conditions on laminin and without FBS for four days.

#### **Supplemental Figure 1**

Immunofluorescent staining of glutamine synthetase (red) in undifferentiated AR42J-B13 cells and cells subjected to differentiation-inducing conditions on day 5, with DAPI (blue) for nuclear visualisation. Undiff - undifferentiated cells; Diff control - differentiation control, with FBS, on plastic; FBS Fibro - differentiation medium, with FBS, on fibronectin; SF Fibro - differentiation medium, serum-free, on fibronectin; FBS Lam - differentiation medium, with FBS, on laminin; SF Lam - differentiation medium, serum-free, on laminin.

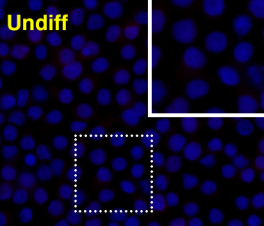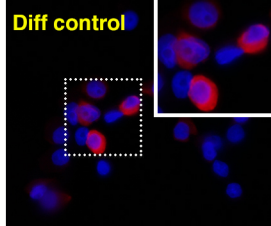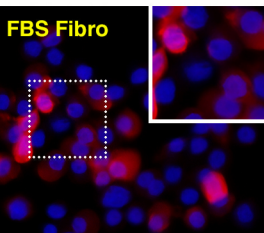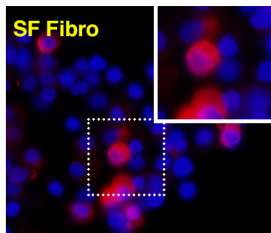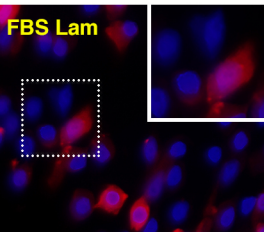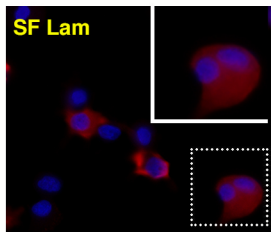

Supplement: 41598_2018_22596_MOESM2_ESM.pdf [file 41598_2018_22596_MOESM2_ESM.pdf]
